# Supplementary material for: Preservation of Fluorescence Signal and Imaging Optimization for Integrated Light and Electron Microscopy
Source: PubMed Central journal article supplement (PMC8715528; doi:10.3389/fcell.2021.737621), 2021-12-15

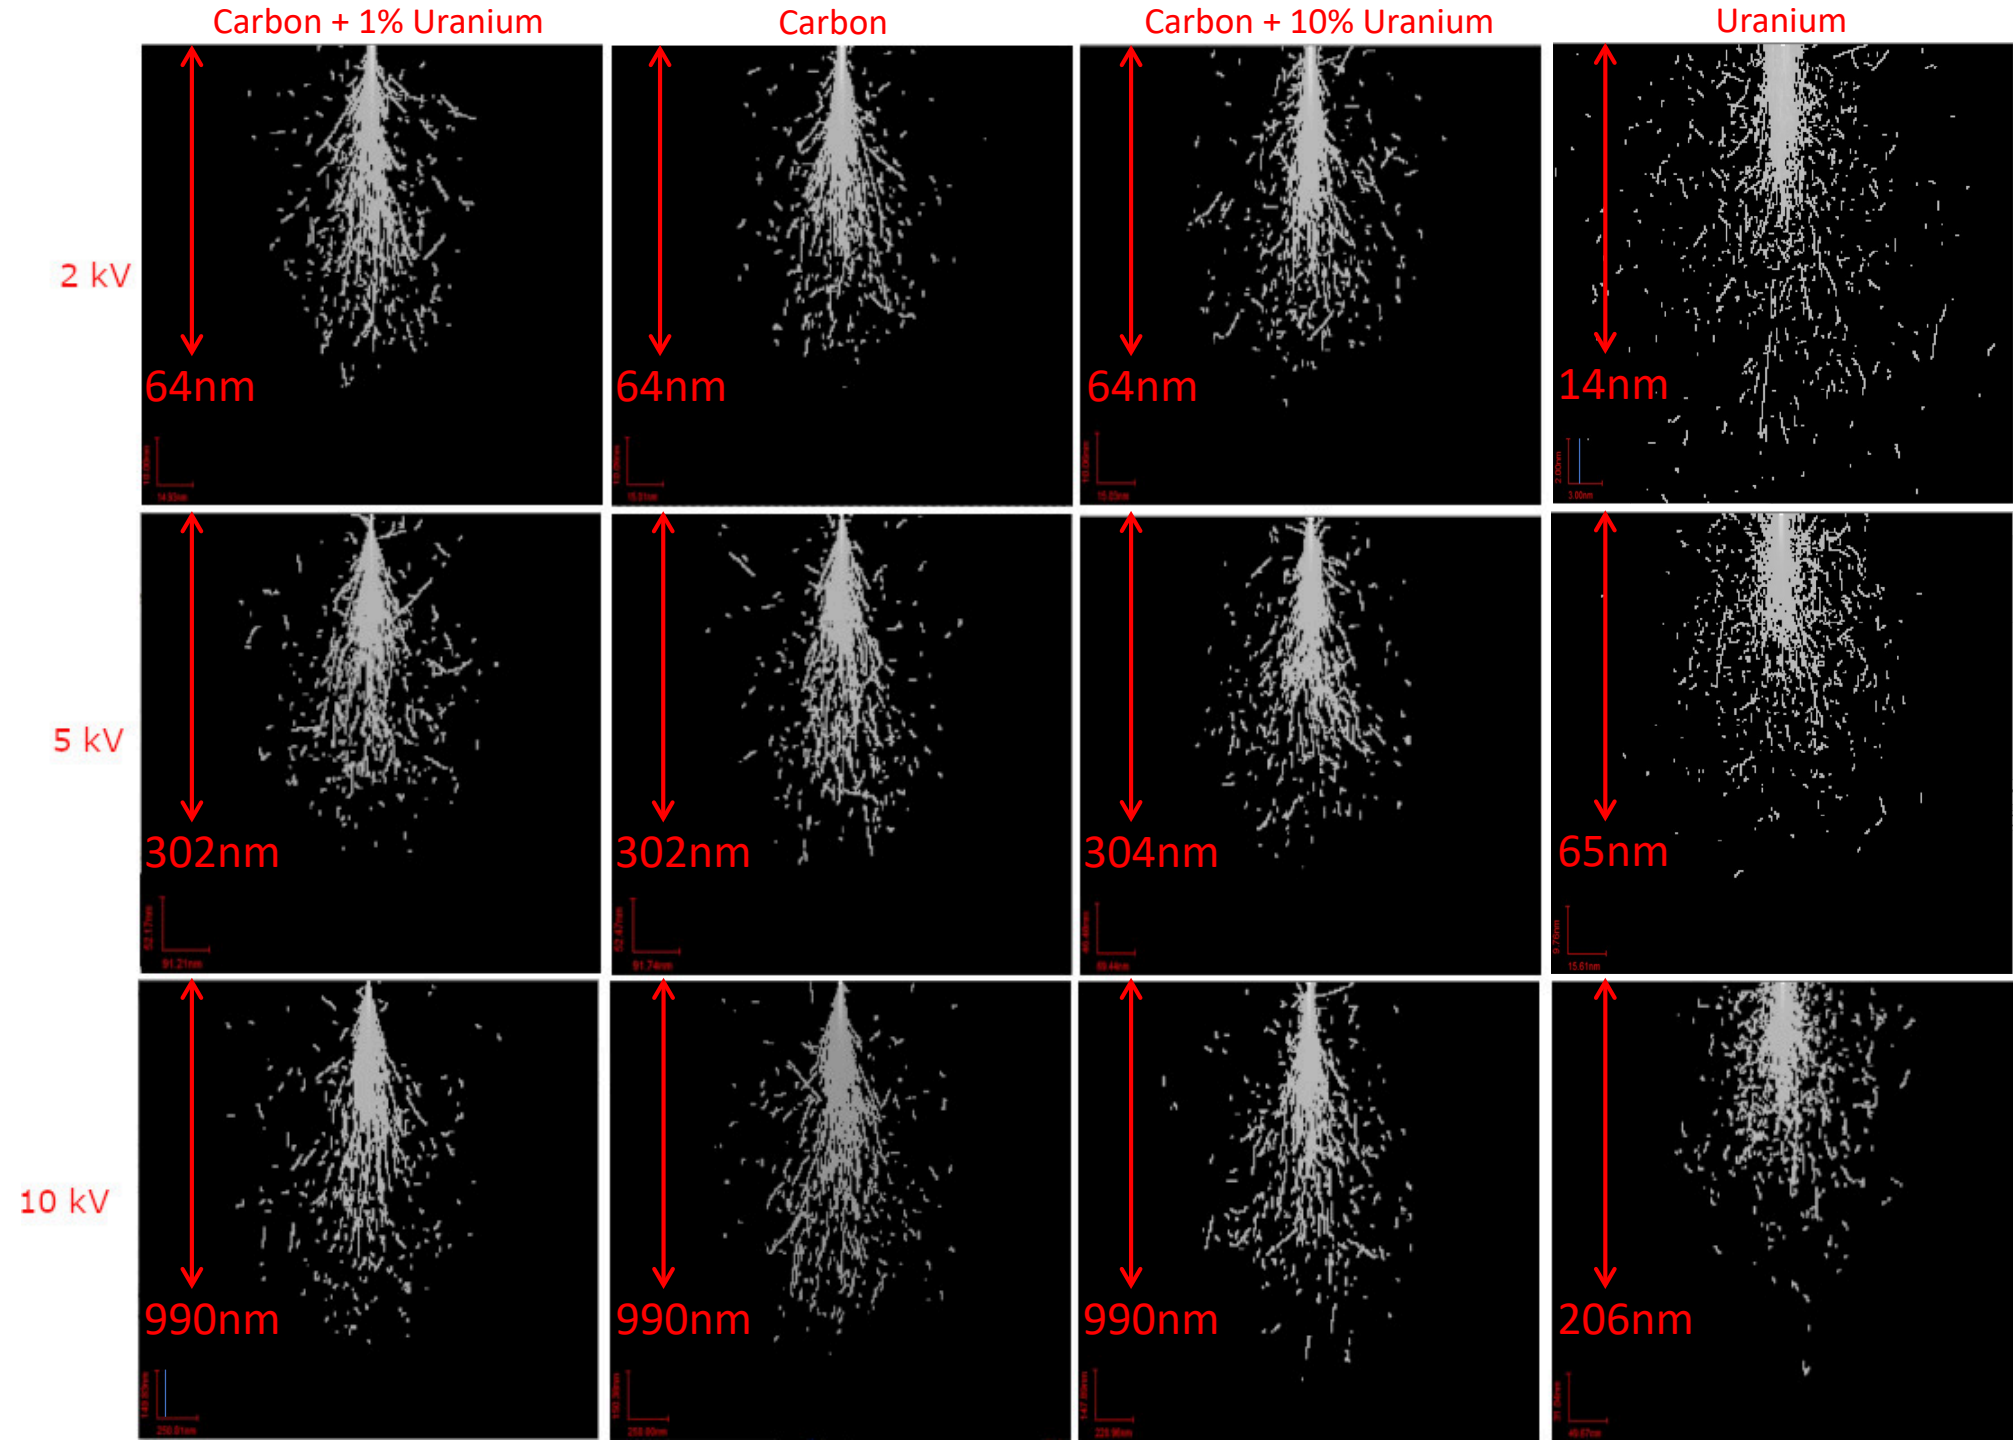

Supplement: Image5.pdf [file Image5.pdf]
